# Supplementary material
Source: PubMed Central journal article supplement (PMC3059746)
Supplement: NIHMS248198-supplement-supplement_1.pdf [file NIHMS248198-supplement-supplement_1.pdf]

## 1 **ONLINE METHODS**

2 **Cell lines.** Vero, Vero-SLAM<sup>48</sup>, Vero-His<sup>38</sup> and BHK-T7<sup>49</sup> cells were propagated in  
3 Dulbecco's Modified Eagle Medium (DMEM) supplemented with 10 % (v/v) fetal bovine  
4 serum (FBS). Vero-SLAM, Vero-His and BHK-T7 cells were also supplemented with  
5 100 µg ml<sup>-1</sup> G418.

6 **Plasmids and mutagenesis.** Mutations were introduced into the MV H expression  
7 plasmid (pCG-H)<sup>50</sup> using the QuikChange Mutagenesis Kit (Stratagene, La Jolla, CA)  
8 according to the manufacturer's instructions. All cysteine substitution mutants were  
9 introduced in a vaccine-lineage H backbone (H-NSe)<sup>51</sup>, while the hexahistidine  
10 insertions were also made in the wild type H-protein backbone (H-wt-323)<sup>52</sup>.

11 **Selection of MV H dimer interface residues for cysteine substitution.** Designs were  
12 based on the MV H dimer crystal structure (PDB-code 2ZB5). First, we identified the  
13 dimer interface residues with the program GetArea<sup>53</sup>. Within this set of residues we  
14 then identified pairs across the dimer interface, which have their C-alpha atoms 3.0–  
15 7.5Å apart. These two filters reduced the number of potential cysteine bonded pairs to  
16 10. Four of these residues located near the symmetry axis were predicted to bond with  
17 the same residue on the other subunit, forming a single disulfide bond, the other  
18 residues were predicted to form twin bonds, and sometimes one residue had two  
19 potential partners.

20 **Mammalian cell transfection and fusion assays.** Lipofectamine 2000 (Invitrogen,  
21 Carlsbad, CA) was used for all mammalian cell transfections according to the  
22 manufacturer's instructions. The standard fusion assay was performed as described<sup>27</sup>.  
23 Briefly, 0.8 µg each of pCG-H, the fusion protein expression plasmid, pCG-F and

1 peGFP (enhanced GFP expression plasmid) were transfected into Vero, Vero-SLAM or  
2 Vero-His cells ( $1.5 \times 10^5$  cells). Fusion scores were determined 24 hours post-  
3 transfection. A fusion score of 3 denotes wild type fusion levels; 2 and 1, intermediate  
4 fusion; and 0, no fusion. In order to rescue the fusion function of cysteine substitution  
5 mutants, 24 hours post-transfection, Vero cells were treated for 20 min with 12 mM DTT  
6 in phosphate-buffered saline (PBS). Fusion was recorded 1–2 hours post DTT  
7 treatment.

8 **Quantitative fusion assay.** BHK-T7 cells ( $1.5 \times 10^5$ ) in a 24-well plate were transfected  
9 with 0.5  $\mu\text{g}$  each of pCG-H and pCG-F plasmids. A similar number of Vero, Vero-SLAM  
10 or Vero-His cells were transfected with 0.35  $\mu\text{g}$  of pTM1-luc (luciferase expression  
11 plasmid under the control of T7 polymerase). Six hours post-transfection, the Vero,  
12 Vero-SLAM or Vero-His cells were washed three times with PBS and detached by  
13 Versene treatment and resuspended in DMEM (10% v/v FBS). The BHK-T7 cells were  
14 washed three times with PBS and overlaid with  $1.5 \times 10^5$  Vero, Vero-SLAM or Vero-His  
15 cells. Six, 12- or 18-hours post-overlay, the luciferase expression levels were quantified  
16 using the Steady-Glo Luciferase Assay System (Promega, Fitchburg, WI).

17 **Immunoblot analysis.** For immunoblot analysis,  $4 \times 10^5$  Vero cells in a 12-well were  
18 transfected with 1.6  $\mu\text{g}$  of the relevant pCG-H expression plasmid. Twenty-four hours  
19 post-transfection the cells were washed with PBS and cytoplasmic extracts generated  
20 using 0.15 ml of lysis buffer (150 mM NaCl, 1.0% v/v NP-40, 0.5% w/v deoxycholate,  
21 0.1% w/v sodium dodecyl sulfate [SDS], 50 mM Tris-HCl [pH 8.0]) with protease  
22 inhibitors (Complete; Roche Biochemicals, Basel, Switzerland). The lysis buffer was  
23 supplemented with 10 mM iodoacetamide for extraction of the cysteine mutant H-

1 proteins. The extracts were mixed with an equal volume of 2× Laemmli sample buffer  
2 and separated on a 4–15% SDS-PAGE gel in the presence or absence of β-  
3 mercaptoethanol. The proteins were transferred onto a PVDF membrane and probed  
4 with an anti-H (cytoplasmic tail) primary antibody <sup>54</sup> and a horseradish peroxidase  
5 conjugated goat-anti-rabbit secondary antibody (Jackson ImmunoResearch, West  
6 Grove, PA). Protein bands were revealed using the ECL Western Blotting Substrate  
7 (Pierce, Rockford, IL). β-actin expression levels were used as loading controls.

8 **FACS Analysis.** To quantify cells surface expression of the mutant H-proteins,  $5 \times 10^5$   
9 Vero cells were transfected with 4 μg of the corresponding mutant. Twenty-four hours  
10 post-transfection cells were harvested by Versene (Gibco) treatment. Cells were  
11 incubated with an anti-H ectodomain antibody (MAB8905; Chemicon), a conformation  
12 specific antibody (BH6 <sup>37</sup>), or an anti-His antibody (Qiagen) depending on the mutant H-  
13 protein. Primary antibodies were diluted 1:50 in FACS wash buffer (PBS, 2% v/v FCS  
14 and 0.1% w/v sodium azide) and incubated with cells for 1 hour at 4°C. Cells were  
15 washed 3× with FACS wash buffer prior to incubation with a FITC-conjugated  
16 secondary antibody (Jackson ImmunoResearch, West Grove, PA) for 1 hour at 4°C.  
17 Cells were washed 3× with FACS wash buffer and fixed with 2% (v/v) paraformaldehyde  
18 prior to FACS analysis. The H-expressing cells were gated and the mean fluorescence  
19 intensity determined for each mutant.

20
